# Supplementary material
Source: PubMed Central journal article supplement (PMC11104262)
Supplement: NIHMS1985838-supplement-SuppTables1-3.pdf [file NIHMS1985838-supplement-SuppTables1-3.pdf]

Supplementary Table 1 | Histological to *in vivo* conversion of layer widths derived from Lein et al., 2007 (Ref. 79)

Related to Figs. 7,8 and Extended Data Figs. 7,9,10

| Cortical Layer | Z-depth through PPC (Allen Brain Atlas) - Top ( $\mu\text{m}$ ) | Z-depth through PPC (Allen Brain Atlas) - Bottom ( $\mu\text{m}$ ) | Layer Widths ( $\mu\text{m}$ ) | Multiplication Factor (Layer Width / 871 $\mu\text{m}$ ) |
|----------------|-----------------------------------------------------------------|--------------------------------------------------------------------|--------------------------------|----------------------------------------------------------|
| 1              | 0                                                               | 130                                                                | 130                            | 0.149                                                    |
| 2-3            | 130                                                             | 378                                                                | 248                            | 0.285                                                    |
| 4              | 378                                                             | 492                                                                | 114                            | 0.131                                                    |
| 5-6            | 492                                                             | 871                                                                | 379                            | 0.435                                                    |

Supplementary Table 2 | Antibody specifications

|                      | Antigen                                                                 | Host            | Time of L.A.B. Treatment | Source                          | Antibody #    | Dilution |
|----------------------|-------------------------------------------------------------------------|-----------------|--------------------------|---------------------------------|---------------|----------|
| Primary Antibodies   | Anti-Enhanced Green Fluorescent Protein (EGFP)                          | Chicken         | NA                       | Aves                            | GFP1020       | 1:1000   |
|                      | Anti-Enhanced Green Fluorescent Protein (EGFP)                          | Goat            | NA                       | SciGen                          | AB0066        | 1:2000   |
|                      | Anti-Glial Fibrillary Acidic Protein (GFAP)                             | Mouse IgG1      | NA                       | Sigma                           | G3893-GA5     | 1:1000   |
|                      | Anti-Heat Shock Proteins 70/72 (HSP70/72)                               | Mouse IgG1      | 7 min.                   | Enzo                            | ADI-SPA-810-D | 1:400    |
|                      | Anti-Ionized Calcium-Binding Adapter Molecule 1 (Iba-1)                 | Rabbit          | NA                       | Wako                            | 019-19741     | 1:1000   |
|                      | Anti-H2A Histone Family Member X ( $\gamma$ -H2AX)                      | Rabbit          | NA                       | Cell Signaling                  | S139-20E3     | 1:500    |
|                      | Anti-8-hydroxyguanosine (8-OHG)                                         | Mouse IgG2b     | NA                       | Fisher                          | MA110602-15A3 | 1:1500   |
|                      | Anti-Platelet-Derived Growth Factor Receptor - Alpha (Pdgfr- $\alpha$ ) | Goat            | NA                       | R&D Biosystems                  | AF1062        | 1:2000   |
|                      | Anti-aspartoacylase (ASPA)                                              | Rabbit          | 5 min.                   | Genetex                         | ABN1698       | 1:1000   |
|                      | Anti-neuronal nuclear protein (NeuN)                                    | Chicken         | NA                       | Millipore                       | ABN91         | 1:500    |
|                      | Anti pan-Neurofilament (SMI-312)                                        | Mouse IgG1      | NA                       | BioLegend                       | NC1239357     | 1:250    |
|                      | Anti-vesicular glutamate transporter 2 (Vglut2)                         | Guinea Pig      | NA                       | EMD Millipore                   | AB2251-I      | 1:1000   |
|                      | Secondary Antibodies                                                    | anti-Rabbit 405 | Donkey                   | see above for antibody pairings | Invitrogen    | A48258   |
| anti-Chicken 405     |                                                                         | Donkey          |                          | Jackson                         | 703-475-155   | 1:300    |
| anti-Chicken 488     |                                                                         | Donkey          |                          | Jackson                         | 703-545-155   | 1:500    |
| anti-Goat 488        |                                                                         | Donkey          |                          | Jackson                         | 705-545-003   | 1:500    |
| anti-Goat 546        |                                                                         | Donkey          |                          | Jackson                         | A11056        | 1:500    |
| anti-Rabbit Cy3      |                                                                         | Donkey          |                          | Jackson                         | 711-165-152   | 1:500    |
| anti-Mouse IgG2b 570 |                                                                         | Goat            |                          | Jackson                         | 115-297-187   | 1:500    |
| anti-Guinea Pig 568  |                                                                         | Goat            |                          | Invitrogen                      | A11075        | 1:500    |
| anti-Mouse IgG1 647  |                                                                         | Goat            |                          | Jackson                         | 115-607-185   | 1:500    |

## Supplementary Table 3 | Statistics results table

Statistics results are sorted by figure, and both main figures and supplementary figures are listed in the order they appear in the text.

Statistically significant comparisons are bolded

Table 3.1 | Statistics for Figure 1 and associated extended data (Extended Data Figs. 2,3)

| Fig. 1           | Measure                                                                                                                         | Values                                                                                                                                                                                           | N                                                                                                                                       | Statistical test                                                                                                                                                                      | Significance                                                                                                                                                                                                                                                               |
|------------------|---------------------------------------------------------------------------------------------------------------------------------|--------------------------------------------------------------------------------------------------------------------------------------------------------------------------------------------------|-----------------------------------------------------------------------------------------------------------------------------------------|---------------------------------------------------------------------------------------------------------------------------------------------------------------------------------------|----------------------------------------------------------------------------------------------------------------------------------------------------------------------------------------------------------------------------------------------------------------------------|
| Fig. 1c          | Signal to background ratio with two-photon vs. three-photon imaging at different brain depths                                   | 501-600 $\mu\text{m}$ : $4.602 \pm 1.580$ (two-photon) vs. $19.662 \pm 2.775$ (three-photon)<br><br>601-700 $\mu\text{m}$ : $3.667 \pm 0.353$ (two-photon) vs. $17.876 \pm 3.206$ (three-photon) | n=4 two-photon mice, 50 - 74 oligodendrocytes analyzed per mouse, n=4 three-photon mice, 101 - 123 analyzed oligodendrocytes per mouse. | Shapiro-Wilk W Test on distributions of imaging modality and depth not significant. Two-Way ANOVA followed by pairwise comparisons with Bonferroni correction.                        | <b>F(7) = 5.78, Prob &gt;F &lt;0.0001 (imaging x depth)</b><br><br><b>501-600 <math>\mu\text{m}</math>: t(6) = 4.716, p=0.003;</b><br><br><b>601-700 <math>\mu\text{m}</math>: t(3.072) = 4.406, p = 0.021</b><br><br><b>Bonferroni corrected alpha = 0.025*. 0.0125**</b> |
| Fig. 1d          | Number of oligodendrocyte cell bodies > 2 SBR per imaging volume with two-photon vs. three-photon, single comparison at layer 5 | Layer 5: $41.362 \pm 10.650$ vs. $78.753 \pm 10.153$ .                                                                                                                                           | n=4 two-photon mice, n=8 three-photon mice.                                                                                             | Shapiro-Wilk W Test for normality by imaging modality and depth not significant. Single comparison at layer 5 using F-Test followed by unpaired two-tailed student's t-Test for equal | <b>t(10) = 2.286, p=0.045</b>                                                                                                                                                                                                                                              |
| Fig. 1f          | Orientation of THG-positive fibers in the corpus callosum vs. alveus.                                                           | $15.27 \pm 4.942$ (corpus callosum) vs. $-0.403 \pm 1.041$ (alveus) degrees                                                                                                                      | n=41 cells from 3 mice pre-learning, and n=29 cells from 3 mice post-learning                                                           | Shapiro-Wilk W Test not significant. F-Test followed by unpaired two-tailed student's t-Test for unequal variance.                                                                    | <b>t(5.573) = -3.244, p=0.026</b>                                                                                                                                                                                                                                          |
| Ext. Data Fig. 2 | Measure                                                                                                                         | Values                                                                                                                                                                                           | N                                                                                                                                       | Statistical test                                                                                                                                                                      | Significance                                                                                                                                                                                                                                                               |
| Fig. 2d          | Percentage of MOBP+ cells that also express ASPA                                                                                | $95.6 \pm 0.75\%$ (cortex) vs. $86.5 \pm 2.63\%$ (white matter)                                                                                                                                  | n=4 mice, 2 sections per mouse                                                                                                          | Shapiro-Wilk W Test not significant. F-Test followed by unpaired two-tailed student's t-Test for equal variance.                                                                      | <b>t(6) = -3.32, p = 0.016</b>                                                                                                                                                                                                                                             |
| Fig. 3f          | Lateral intensity of oligodendrocyte cell bodies with and without Adaptive Optics                                               | $631.77 \pm 68.15$ vs. $983.34 \pm 100.95$ a.u.                                                                                                                                                  | n = 2 mice, 11 oligodendrocytes at >800 $\mu\text{m}$ depth                                                                             | Shapiro-Wilk W Test not significant. Paired one-sample t-Test, two-tailed.                                                                                                            | <b>p = 0.0002</b>                                                                                                                                                                                                                                                          |
| Fig. 3g          | Axial intensity of oligodendrocyte cell bodies with and without Adaptive Optics                                                 | $12.96 \pm 0.97$ vs. $9.59 \pm 1.03$ $\mu\text{m}$                                                                                                                                               | n = 2 mice, 11 oligodendrocytes at >800 $\mu\text{m}$ depth                                                                             | Shapiro-Wilk W Test not significant. Paired one-sample t-Test, two-tailed.                                                                                                            | <b>p = 0.014</b>                                                                                                                                                                                                                                                           |

Supplementary Table 3 | Statistics results table

Statistics results are sorted by figure, and both main figures and supplementary figures are listed in the order they appear in the text.

**Statistically significant comparisons are bolded**

Table 3.2 | Statistics for Figure 3 and associated extended data (Extended Data Fig. 6)

| Fig. 3         | Measure                                                                                 | Values                                                                                                          | N                                                                                          | Statistical test                                                                                      | Significance                  |
|----------------|-----------------------------------------------------------------------------------------|-----------------------------------------------------------------------------------------------------------------|--------------------------------------------------------------------------------------------|-------------------------------------------------------------------------------------------------------|-------------------------------|
| <b>Fig. 3e</b> | # of HSP70/72-positive oligodendrocytes per mm <sup>2</sup> (healthy long-term imaging) | 20.952±12.67 (contralateral) vs. 27.73±11.72 (ipsilateral)                                                      | n = 5 mice, 2 sections / 4 hemispheres per mouse                                           | Shapiro-Wilk W Test not significant. Paired one-sample t-Test, two-tailed.                            | p = 0.551                     |
| <b>Fig. 3f</b> | # of HSP70/72-positive oligodendrocytes per mm <sup>2</sup> (laser-induced injury)      | 39.2±18.6 (contralateral) vs. 71.7±22.6 (ipsilateral)                                                           | n = 5 mice, 2 sections / 4 hemispheres per mouse                                           | Shapiro-Wilk W Test not significant. Paired one-sample t-Test, two-tailed.                            | <b>p = 0.041</b>              |
| <b>Fig. 3g</b> | Ratio of the ipsilateral : contralateral normalized HSP70/72 fluorescence intensity     | Mean intensity (imaged) / Mean intensity (contralateral). 0.91±0.08 (Healthy) vs. 5.26±2.46 (laser-injury)      | n = 5 mice (healthy), n= 5 mice (laser-injury) 2 sections / 4 hemispheres per mouse        | Shapiro-Wilk W Test significant. Wilcoxon rank sum test.                                              | <b> z  = 2.089, p = 0.037</b> |
| <b>Fig. 3h</b> | # of γ-H2A.X-positive oligodendrocytes per mm <sup>2</sup> (healthy long-term imaging)  | 21.94±7.59 (contralateral) vs. 36.45±12.39 (ipsilateral) γ-H2A.X-positive oligodendrocytes per mm <sup>2</sup>  | n = 5 mice, 2 sections / 4 hemispheres per mouse                                           | Shapiro-Wilk W Test not significant. Paired one-sample t-Test, two-tailed.                            | t(4) = 1.36, p = 0.244        |
| <b>Fig. 3i</b> | # of γ-H2A.X-positive oligodendrocytes per mm <sup>2</sup> (laser-induced injury)       | 19.69±9.98 (contralateral) vs. 35.306±13.28 (ipsilateral) γ-H2A.X-positive oligodendrocytes per mm <sup>2</sup> | n = 5 mice, 2 sections / 4 hemispheres per mouse                                           | Shapiro-Wilk W Test not significant. Paired one-sample t-Test, two-tailed.                            | t(4) = 1.41, p = 0.231        |
| <b>Fig. 3j</b> | Ratio of the ipsilateral : contralateral normalized γ-H2A.X- fluorescence intensity     | Mean intensity (imaged) / Mean intensity (contralateral). 0.94±0.04 (Healthy) vs. 2.39±0.68 (laser-injury)      | n = 5 mice (healthy), n= 5 mice (laser-injury) 2 sections / 4 hemispheres per mouse        | Shapiro-Wilk W Test significant. Wilcoxon rank sum test.                                              | z  = 1.462, p = 0.144         |
| <b>Fig. 3l</b> | Mean rate of healthy oligodendrocyte gain per week (Two-photon vs. Three-photon)        | Two-photon = 1.7±0.2 vs. Three-photon = 1.4±0.3% gained per week                                                | n=5 mice, 477 oligodendrocytes (Two-photon); n=4 mice, 340 oligodendrocytes (Three-photon) | Shapiro-Wilk W Test not significant. F-Test followed by one-way, two-tailed unpaired Student's t-Test | t(6) = 0.819, p = 0.440       |

Table 3.2 (cont'd) | Statistics for Extended Data Fig. 6

| Ext. Data Fig. 6 | Measure                                                                                                      | Values                                                                                                          | N                                                                                    | Statistical test                                                                                                 | Significance            |
|------------------|--------------------------------------------------------------------------------------------------------------|-----------------------------------------------------------------------------------------------------------------|--------------------------------------------------------------------------------------|------------------------------------------------------------------------------------------------------------------|-------------------------|
| Fig. 6d          | # of MOBP-EGFP-positive oligodendrocytes per mm <sup>2</sup> (healthy long-term imaging)                     | 765.02±83.00 (contralateral) vs. 703.67±38.55 (ipsilateral)                                                     | n = 5 mice, 2 sections / 4 hemispheres per mouse                                     | Shapiro-Wilk W Test significant. Wilcoxon signed rank test.                                                      | Prob >  S  = 1.00       |
| Fig. 6e          | # of MOBP-EGFP-positive oligodendrocytes per mm <sup>2</sup> (laser-induced injury)                          | 610.60±119.3 (contralateral) vs. 488.03±75.64 (ipsilateral)                                                     | n = 5 mice, 2 sections / 4 hemispheres per mouse                                     | Shapiro-Wilk W Test not significant. Paired one-sample t-Test, two-tailed.                                       | t(4) = -1.16, p = 0.311 |
| Fig. 6f          | Ratio of the ipsilateral : contralateral normalized MOBP-EGFP fluorescence intensity                         | Mean intensity (imaged) / Mean intensity (contralateral). 0.92±0.09 (Healthy) vs. 1.14±0.06 (laser-injury)      | n = 5 mice (healthy), n = 5 mice (laser-injury) 2 sections / 4 hemispheres per mouse | Shapiro-Wilk W Test not significant. F-Test followed by unpaired two-tailed student's t-Test for equal variance. | t(4) = 2.04, p = 0.076  |
| Fig. 6g          | # of Iba-1-positive microglia per mm <sup>2</sup> (healthy long-term imaging)                                | 312.19±22.16 (contralateral) vs. 325.3                                                                          | n = 5 mice, 2 sections / 4 hemispheres per mouse                                     | Shapiro-Wilk W Test not significant. Paired one-sample t-Test, two-tailed.                                       | t(4) = 0.48, p = 0.658  |
| Fig. 6h          | # of Iba-1-positive microglia per mm <sup>2</sup> (laser-induced injury)                                     | 262.2±18.3 (contralateral) vs. 440.7±4                                                                          | n = 5 mice, 2 sections / 4 hemispheres per mouse                                     | Shapiro-Wilk W Test not significant. Paired one-sample t-Test, two-tailed.                                       | t(4) = 3.99, p = 0.016  |
| Fig. 6i          | Ratio of the ipsilateral : contralateral normalized Iba-1 fluorescence intensity                             | Mean intensity (imaged) / Mean intensity (contralateral). 0.98±0.03 (Healthy) vs. 1.11±0.04 (laser-injury)      | n = 5 mice (healthy), n = 5 mice (laser-injury) 2 sections / 4 hemispheres per mouse | Shapiro-Wilk W Test not significant. F-Test followed by unpaired two-tailed student's t-Test for equal variance. | t(8) = 2.73, p = 0.026  |
| Fig. 6j          | # of GFAP-positive astrocytes per mm <sup>2</sup> (healthy long-term imaging)                                | 148.08±52.70 (contralateral) vs. 126.4                                                                          | n = 5 mice, 2 sections / 4 hemispheres per mouse                                     | Shapiro-Wilk W Test not significant. Paired one-sample t-Test, two-tailed.                                       | t(4) = -0.73, p = 0.504 |
| Fig. 6k          | # of GFAP-positive astrocytes per mm <sup>2</sup> (laser-induced injury)                                     | 142.4±49.7 (contralateral) vs. 290.8±7                                                                          | n = 5 mice, 2 sections / 4 hemispheres per mouse                                     | Shapiro-Wilk W Test significant. Wilcoxon signed rank test.                                                      | t(4) = 3.94, p = 0.017  |
| Fig. 6l          | Ratio of the ipsilateral : contralateral normalized GFAP fluorescence intensity                              | Mean intensity (imaged) / Mean intensity (contralateral). 1.04±0.05 (contralateral) vs. 1.24±0.27 (ipsilateral) | n = 5 mice (healthy), n = 5 mice (laser-injury) 2 sections / 4 hemispheres per mouse | Shapiro-Wilk W Test significant. Wilcoxon rank sum test.                                                         | z  = 2.09, p = 0.037    |
| Fig. 6m          | # of 8-OHG-positive neurons greater than 90% pixel threshold per mm <sup>2</sup> (healthy long-term imaging) | 303.72±77.31 (contralateral) vs. 342.39±69.71 (ipsilateral)                                                     | n = 5 mice, 2 sections / 4 hemispheres per mouse                                     | Shapiro-Wilk W Test not significant. Paired one-sample t-Test, two-tailed.                                       | t(4) = 0.62, p = 0.572  |
| Fig. 6n          | # of 8-OHG-positive neurons greater than 90% pixel threshold per mm <sup>2</sup> (laser-induced injury)      | 137.14±61.38 (contralateral) vs. 187.6                                                                          | n = 5 mice, 2 sections / 4 hemispheres per mouse                                     | Shapiro-Wilk W Test significant. Wilcoxon signed rank test.                                                      | t(4) = 0.59, p = 0.589  |
| Fig. 6o          | Ratio of the ipsilateral : contralateral normalized 8-OHG fluorescence intensity                             | Mean intensity (imaged) / Mean intensity (contralateral). 0.93±0.04 (contralateral) vs. 1.63±0.30 (ipsilateral) | n = 5 mice (healthy), n = 5 mice (laser-injury) 2 sections / 4 hemispheres per mouse | Shapiro-Wilk W Test not significant. F-Test followed by unpaired two-tailed student's t-Test for equal variance. | t(8) = 1.57, p = 0.154  |
| Fig. 6p          | Percentage of vascular coverage (segmented Lectin-649 positive area, healthy long-term imaging)              | 14.22±1.43 (contralateral) vs. 13.30±1.30% (ipsilateral) of image area                                          | n = 5 mice, 2 sections / 4 hemispheres per mouse                                     | Shapiro-Wilk W Test not significant. Paired one-sample t-Test, two-tailed.                                       | t(4) = -1.91, p = 0.13  |
| Fig. 6q          | Percentage of vascular coverage (segmented Lectin-649 positive area, laser-induced injury)                   | 16.8±2.3 (contralateral) vs. 22.8±3.4% (ipsilateral) of image area                                              | n = 5 mice, 2 sections / 4 hemispheres per mouse                                     | Shapiro-Wilk W Test not significant. Paired one-sample t-Test, two-tailed.                                       | t(4) = 3.65, p = 0.022  |
| Fig. 6r          | # of CD13-positive pericytes per mm <sup>2</sup> (healthy long-term imaging)                                 | 320.94±53.36 (contralateral) vs. 272.2                                                                          | n = 5 mice, 2 sections / 4 hemispheres per mouse                                     | Shapiro-Wilk W Test not significant. Paired one-sample t-Test, two-tailed.                                       | t(4) = -2.02, p = 0.114 |
| Fig. 6s          | # of CD13-positive pericytes per mm <sup>2</sup> (laser-induced injury)                                      | 218.60±23.67 (contralateral) vs. 300.7                                                                          | n = 5 mice, 2 sections / 4 hemispheres per mouse                                     | Shapiro-Wilk W Test not significant. Paired one-sample t-Test, two-tailed.                                       | t(4) = 2.24, p = 0.088  |

Supplementary Table 3 | Statistics results table

Statistics results are sorted by figure, and both main figures and supplementary figures are listed in the order they appear in the text.

Statistically significant comparisons are bolded

Table 3.3 | Statistics for Figure 4 and associated extended data (Extended Data Fig. 7)

| Fig. 4           | Measure                                                                                                                      | Values                                                                                              | N                                                         | Statistical test                                                                                                           | Significance                                                                         |
|------------------|------------------------------------------------------------------------------------------------------------------------------|-----------------------------------------------------------------------------------------------------|-----------------------------------------------------------|----------------------------------------------------------------------------------------------------------------------------|--------------------------------------------------------------------------------------|
| Fig. 4e          | Total # new oligodendrocytes / 350 x 350 x 60 $\mu$ m volume at 66 day time point (Gray Matter vs. White Matter)             | 33.8±5.5 vs. 10.9±1.3 OLs / imaging volume                                                          | n = 5 mice                                                | Shapiro-Wilk W Test not significant. F-Test followed by one-way, two-tailed unpaired Student's t-Test for unequal variance | <b>t(4.45) = 4.03, p = 0.013</b>                                                     |
|                  | Rate of new oligodendrocytes gained / Week / 350 x 350 x 60 $\mu$ m volume (Gray Matter vs. White Matter)                    | 3.9±0.6 vs. 1.2±0.1 OLs / volume / week                                                             | n = 6 mice                                                | Shapiro-Wilk W Test not significant. F-Test followed by one-way, two-tailed unpaired Student's t-Test for unequal variance | <b>t(5.44) = 4.74, p = 0.005</b>                                                     |
| Fig. 4g          | Total % Oligodendrocyte Gain at 66 day time point (Gray Matter vs. White Matter)                                             | 19.1±2.1% vs. 12.1±1.3%                                                                             | n = 5 mice                                                | Shapiro-Wilk W Test not significant. F-Test followed by one-way, two-tailed unpaired Student's t-Test for equal variance   | <b>t(8) = -2.83, p = 0.022</b>                                                       |
| Fig. 4h          | % Rate of Oligodendrocyte Gain (Gray Matter vs. White Matter) at 5 week time point calculated from Mechanistic Growth Curves | 2.3±0.3 vs. 1.3±0.2% per week                                                                       | n = 6 mice                                                | Shapiro-Wilk W Test not significant. F-Test followed by one-way, two-tailed unpaired Student's t-Test for equal variance   | <b>t(10) = -2.756, p = 0.020</b>                                                     |
| Fig. 4i          | Time at 50% OL gain (days) calculated from Mechanistic Growth Curves (Gray Matter vs. White Matter)                          | 26.8±2.2 vs. 24.3±4.4 days post-P70                                                                 | n = 6 mice                                                | Shapiro-Wilk W Test not significant. F-Test followed by one-way, two-tailed unpaired Student's t-Test for equal variance   | t(10) = -0.52, p = 0.615                                                             |
| Fig. 4j          | Two-week binned rates of oligodendrocyte gain (not modeled, % per week, GM vs. WM)                                           | 1.0±0.4 vs. 2.5±0.5, WM, Weeks 5-6 vs. Weeks 1-2; 0.8±0.2 vs. 2.5±0.5, WM, Weeks 9-10 vs. Weeks 1-2 | n = 6 mice                                                | Shapiro-Wilk W Test not significant. One-way ANOVA followed by Dunnett's test with control.                                | <b>p = 0.037 for Weeks 5-6 vs. Weeks 1-2; p = 0.022 for Weeks 9-10 vs. Weeks 1-2</b> |
| Fig. 4n          | Change in percentage of MOL1-positive oligodendrocytes with aging in GM (%P140 - %P60)                                       | -4.94±3.45% vs. normalized % at P60                                                                 | n = 6 mice (P60), n = 8 mice (P140), 2 sections per mouse | Shapiro-Wilk W Test not significant. F-Test followed by one-way, two-tailed unpaired Student's t-Test for equal variance   | t(12) = -0.81, p = 0.434                                                             |
|                  | Change in percentage of MOL2/3-positive oligodendrocytes with aging in GM (%P140 - %P60)                                     | 0.07±0.51% vs. normalized % at P60                                                                  | n = 6 mice (P60), n = 8 mice (P140), 2 sections per mouse | Shapiro-Wilk W Test not significant. F-Test followed by one-way, two-tailed unpaired Student's t-Test for equal variance   | t(12) = 0.10, p = 0.919                                                              |
|                  | Change in percentage of MOL5/6-positive oligodendrocytes with aging in GM (%P140 - %P60)                                     | -3.99±3.42% vs. normalized % at P60                                                                 | n = 6 mice (P60), n = 8 mice (P140), 2 sections per mouse | Shapiro-Wilk W Test not significant. F-Test followed by one-way, two-tailed unpaired Student's t-Test for equal variance   | t(12) = 0.80, p = 0.440                                                              |
|                  | Change in percentage of MOL1-positive oligodendrocytes with aging in WM (%P140 - %P60)                                       | 0.19±0.17% vs. normalized % at P60                                                                  | n = 6 mice (P60), n = 8 mice (P140), 2 sections per mouse | Shapiro-Wilk W Test not significant. F-Test followed by one-way, two-tailed unpaired Student's t-Test for equal variance   | t(12) = -0.67, p = 0.514                                                             |
|                  | Change in percentage of MOL2/3-positive oligodendrocytes with aging in WM (%P140 - %P60)                                     | 0.80±0.82% vs. normalized % at P60                                                                  | n = 6 mice (P60), n = 8 mice (P140), 2 sections per mouse | Shapiro-Wilk W Test significant. Wilcoxon rank sum test.                                                                   | z  = 1.36, p = 0.175                                                                 |
|                  | Change in percentage of MOL5/6-positive oligodendrocytes with aging in WM (%P140 - %P60)                                     | 2.30±4.69% vs. normalized % at P60                                                                  | n = 6 mice (P60), n = 8 mice (P140), 2 sections per mouse | Shapiro-Wilk W Test not significant. F-Test followed by one-way, two-tailed unpaired Student's t-Test for equal variance   | t(12) = 0.25, p = 0.805                                                              |
| Fig. 4o          | Percentage of MOBP-EGFP oligodendrocytes that are MOL1-positive at P140                                                      | 17.2 ± 3.4 (GM) vs. 0.6 ± 0.2% (WM)                                                                 | n = 6 mice (P60), n = 8 mice (P140), 2 sections per mouse | Shapiro-Wilk W Test not significant. F-Test followed by one-way, two-tailed unpaired Student's t-Test for unequal variance | <b>t(7.033) = -4.804, p = 0.002</b>                                                  |
|                  | Percentage of MOBP-EGFP oligodendrocytes that are MOL2/3-positive at P140                                                    | 1.8 ± 0.5 (GM) vs. 3.8 ± 0.8% (WM)                                                                  | n = 6 mice (P60), n = 8 mice (P140), 2 sections per mouse | Shapiro-Wilk W Test significant. Wilcoxon rank sum test.                                                                   | <b> z  = 2.363, p = 0.018</b>                                                        |
|                  | Percentage of MOBP-EGFP oligodendrocytes that are MOL5/6-positive at P140                                                    | 27.4 ± 3.4 (GM) vs. 46.4 ± 4.7% (WM)                                                                | n = 6 mice (P60), n = 8 mice (P140), 2 sections per mouse | Shapiro-Wilk W Test not significant. F-Test followed by one-way, two-tailed unpaired Student's t-Test for equal variance   | <b>t(14) = 3.283, p = 0.005</b>                                                      |
| Ext. Data Fig. 7 | Measure                                                                                                                      | Values                                                                                              | N                                                         | Statistical test                                                                                                           | Significance                                                                         |
| Fig. 7c          | Density of OPCs in posterior parietal cortex (GM) vs. white matter (WM)                                                      | 181.2 ± 7.7 (GM) vs. 248.6 ± 23.8 (WM) mm <sup>2</sup>                                              | n = 4 mice, 3 sections per mouse                          | Shapiro-Wilk W Test not significant. F-Test followed by one-way, two-tailed unpaired Student's t-Test for equal variance   | <b>t(6) = 2.69, p = 0.036</b>                                                        |
| Fig. 7d          | Density of EdU-positive OPCs in posterior parietal cortex (GM) vs. white matter (WM)                                         | 14.6 ± 2.5 (GM) vs. 51.6 ± 6.1 (WM)                                                                 | n = 4 mice, 3 sections per mouse                          | Shapiro-Wilk W Test not significant. F-Test followed by one-way, two-tailed unpaired Student's t-Test for unequal variance | <b>t(6) = 5.29, p = 0.002</b>                                                        |
| Fig. 7f          | % MOBP-EGFP oligodendrocytes positive for Egr2 (MOL1) in the spinal cord GM vs. WM                                           | 18.61 ± 3.9 (GM) vs. 0.05 ± 0.01 (WM)                                                               | n = 3 mice, 2 spinal cord sections per mouse              | Shapiro-Wilk W Test not significant. F-Test followed by one-way, two-tailed unpaired Student's t-Test for unequal variance | <b>t(2.00) = -4.68, p = 0.043</b>                                                    |
|                  | % MOBP-EGFP oligodendrocytes positive for Kik6 (MOL2/3) in the spinal cord GM vs. WM                                         | 1.28 ± 0.26 (GM) vs. 37.23 ± 1.2 (WM)                                                               | n = 3 mice, 2 spinal cord sections per mouse              | Shapiro-Wilk W Test not significant. F-Test followed by one-way, two-tailed unpaired Student's t-Test for unequal variance | <b>t(2.02) = 8.86, p = 0.012</b>                                                     |
|                  | % MOBP-EGFP oligodendrocytes positive for Ptgds (MOL5/6) in the spinal cord GM vs. WM                                        | 32.27 ± 5.31 (GM) vs. 0.90 ± 0.05 (WM)                                                              | n = 3 mice, 2 spinal cord sections per mouse              | Shapiro-Wilk W Test not significant. F-Test followed by one-way, two-tailed unpaired Student's t-Test for unequal variance | <b>t(2.03) = -5.88, p = 0.027</b>                                                    |

Supplementary Table 3 | Statistics results table

Statistics results are sorted by figure, and both main figures and supplementary figures are listed in the order they appear in the text.

Statistically significant comparisons are bolded

Table 3.4 | Statistics for Figure 5

| Fig. 5         | Measure                                                                                                                               | Values                                                                                                                                                                                         | N                                                  | Statistical test                                                                                                              | Significance                                                                                                                             |
|----------------|---------------------------------------------------------------------------------------------------------------------------------------|------------------------------------------------------------------------------------------------------------------------------------------------------------------------------------------------|----------------------------------------------------|-------------------------------------------------------------------------------------------------------------------------------|------------------------------------------------------------------------------------------------------------------------------------------|
| <b>Fig. 5c</b> | % depth of corpus callosum analyzed longitudinally (Healthy vs. Cuprizone)                                                            | 84±8.0% (healthy) vs. 86.8±3.5%                                                                                                                                                                | n=6 mice (Healthy), n = 6 mice (Cuprizone)         | Shapiro-Wilk W Test significant. Wilcoxon rank sum test.                                                                      | Z  = 0.48, p = 0.629                                                                                                                     |
| <b>Fig. 5h</b> | Total # lost oligodendrocytes / 350 x 350 x 60 µm volume at 66 day time point (Gray Matter vs. White Matter)                          | 36.8±6.0 vs. 157.4±37.8 OLS / imaging volume                                                                                                                                                   | n = 6 mice (Cuprizone)                             | Shapiro-Wilk W Test not significant. Test followed by one-way, two-tailed unpaired Student's t-Test for unequal variance      | F- <b>t(5.25) = 3.15, p = 0.024</b>                                                                                                      |
| <b>Fig. 5j</b> | Total % lost oligodendrocytes (Gray Matter vs. White Matter) at 66 day time point.                                                    | 75.3±6.3% (GM) vs. 75.6±7.4% (WM)                                                                                                                                                              | n = 6 mice (Cuprizone)                             | Shapiro-Wilk W Test not significant. Test followed by one-way, two-tailed unpaired Student's t-Test for equal variance        | t(10) = 0.04, p = 0.970                                                                                                                  |
| <b>Fig. 5k</b> | % Rate of Oligodendrocyte Loss during demyelination (Gray Matter vs. White Matter) calculated from Gompertz 3-parameter growth curves | 9.0±0.7% vs. 9.2±1.0% lost per week calculated from Gompertz 3-parameter modeling (Gray Matter vs. White Matter)                                                                               | n = 6 mice (Cuprizone)                             | Shapiro-Wilk W Test not significant. Test followed by one-way, two-tailed unpaired Student's t-Test for equal variance        | F- t(10) = 0.16, p = 0.876                                                                                                               |
| <b>Fig. 5l</b> | Inflection point of loss (days from end of cuprizone) calculated from Gompertz 3-parameter modeling (Gray Matter vs. White Matter)    | 0.4±1.4 (GM) vs. 2.5±2.0 (WM) days post cuprizone                                                                                                                                              | n = 6 mice (Cuprizone)                             | Shapiro-Wilk W Test significant. Wilcoxon rank sum test.                                                                      | Z  = 1.04, p = 0.298                                                                                                                     |
| <b>Fig. 5m</b> | Rates of oligodendrocyte loss binned by 1-3 weeks relative to cuprizone administration (not modeled, % per week, GM vs. WM)           | 9.6±1.8 vs. 2.49±0.93 % per week, GM, Weeks -2 to 0 vs. Week -3; 18.9±1.9 vs. 2.49±0.93% per week, GM, Weeks 0 to 2 vs. Week -3; 22.6±3.1 vs. 2.74±1.8% per week, WM, Weeks 1 to 2 vs. Week -3 | n = 6 mice (Cuprizone)                             | Shapiro-Wilk W Test significant. Kruskal-Wallis followed by Steel Method for nonparametric multiple comparisons with control. | <b>p = 0.018 for Weeks -2 0 vs. Weeks -3, GM; p = 0.018 for Weeks 1 to 2 vs. Week -3, GM; p = 0.018 for Weeks 1 to 2 vs. Week -3, WM</b> |
| <b>Fig. 5q</b> | Change in percentage of MOL1-positive oligodendrocytes with cuprizone demyelination in GM (%Cup. + 4d. - %P140)                       | -15.44±0.65% vs. normalized % at P140                                                                                                                                                          | n = 8 mice (P140), n = 5 mice (Cuprizone + 4 days) | Shapiro-Wilk W Test significant. Wilcoxon rank sum test.                                                                      | Z  = 2.71, p = 0.007                                                                                                                     |
|                | Change in percentage of MOL2/3-positive oligodendrocytes with cuprizone demyelination in GM (%Cup. + 4d. - %P140)                     | -1.76±0.05% vs. normalized % at P140                                                                                                                                                           | n = 8 mice (P140), n = 5 mice (Cuprizone + 4 days) | Shapiro-Wilk W Test significant. Wilcoxon rank sum test.                                                                      | Z  = 2.90, p = 0.004                                                                                                                     |
|                | Change in percentage of MOL5/6-positive oligodendrocytes with cuprizone demyelination in GM (%Cup. + 4d. - %P140)                     | -24.24±1.11% vs. normalized % at P140                                                                                                                                                          | n = 8 mice (P140), n = 5 mice (Cuprizone + 4 days) | Shapiro-Wilk W Test not significant. Test followed by one-way, two-tailed unpaired Student's t-Test for unequal variance      | F- <b>t(8.39) = -6.75, p = 0.0001</b>                                                                                                    |
|                | Change in percentage of MOL1-positive oligodendrocytes with cuprizone demyelination in WM (%Cup. + 4d. - %P140)                       | -0.57±0.06% vs. normalized % at P140                                                                                                                                                           | n = 8 mice (P140), n = 5 mice (Cuprizone + 4 days) | Shapiro-Wilk W Test significant. Wilcoxon rank sum test.                                                                      | Z  = 2.07, p = 0.038                                                                                                                     |
|                | Change in percentage of MOL2/3-positive oligodendrocytes with cuprizone demyelination in WM (%Cup. + 4d. - %P140)                     | -2.58±0.52% vs. normalized % at P140                                                                                                                                                           | n = 8 mice (P140), n = 5 mice (Cuprizone + 4 days) | Shapiro-Wilk W Test significant. Wilcoxon rank sum test.                                                                      | Z  = 2.86, p = 0.004                                                                                                                     |
|                | Change in percentage of MOL5/6-positive oligodendrocytes with cuprizone demyelination in WM (%Cup. + 4d. - %P140)                     | -41.56±1.58% vs. normalized % at P140                                                                                                                                                          | n = 8 mice (P140), n = 5 mice (Cuprizone + 4 days) | Shapiro-Wilk W Test not significant. Test followed by one-way, two-tailed unpaired Student's t-Test for unequal variance      | F- <b>t(8.50) = -8.40, p &lt; 0.0001</b>                                                                                                 |
| <b>Fig. 5r</b> | Percentage of MOBP-EGFP oligodendrocytes that are MOL1-positive 4 days post-cuprizone removal                                         | 1.81 ± 0.65 (GM) vs. 0.09% ± 0.06% (WM)                                                                                                                                                        | n = 5 mice (Cuprizone + 4 days)                    | Shapiro-Wilk W Test significant. Wilcoxon rank sum test.                                                                      | Z  = 2.54, p = 0.011                                                                                                                     |
|                | Percentage of MOBP-EGFP oligodendrocytes that are MOL2/3-positive 4 days post-cuprizone removal                                       | 0.05 ± 0.04 (GM) vs. 1.2 ± 0.23% (WM)                                                                                                                                                          | n = 5 mice (Cuprizone + 4 days)                    | Shapiro-Wilk W Test significant. Wilcoxon rank sum test.                                                                      | Z  = 2.59, p = 0.0097                                                                                                                    |
|                | Percentage of MOBP-EGFP oligodendrocytes that are MOL5/6-positive 4 days post-cuprizone removal                                       | 3.13 ± 1.11 (GM) vs. 4.9 ± 1.6% (WM)                                                                                                                                                           | n = 5 mice (Cuprizone + 4 days)                    | Shapiro-Wilk W Test not significant. Test followed by one-way, two-tailed unpaired Student's t-Test for equal variance        | F- t(8) = 0.89, p = 0.398                                                                                                                |

Supplementary Table 3 | Statistics results table

Statistics results are sorted by figure, and both main figures and supplementary figures are listed in the order they appear in the text.

Statistically significant comparisons are bolded

Table 3.5 | Statistics for Figure 6

| Fig. 6         | Measure                                                                                                                                                | Values                                                                                                            | N                                              | Statistical test                                                                                                           | Significance                                                                                       |
|----------------|--------------------------------------------------------------------------------------------------------------------------------------------------------|-------------------------------------------------------------------------------------------------------------------|------------------------------------------------|----------------------------------------------------------------------------------------------------------------------------|----------------------------------------------------------------------------------------------------|
| <b>Fig. 6e</b> | Total # new oligodendrocytes / 350 x 350 x 60 µm volume after Cuprizone at 66 day time point (Gray Matter vs. White Matter)                            | 13.3±2.0 (GM) vs. 123±47.3 (WM)<br>OLs/imaging volume                                                             | n = 6 mice (cuprizone)                         | Shapiro-Wilk W Test significant. Wilcoxon rank sum test.                                                                   | <b> Z  = 2.80, p = 0.005</b>                                                                       |
| <b>Fig. 6g</b> | Total % Replacement after Cuprizone (% Gain normalized to % Lost) at 66 day time point (Gray Matter vs. White Matter)                                  | 37.6±3.6% (GM) vs. 68.0±11.3% (WM)                                                                                | n = 6 mice (cuprizone)                         | Shapiro-Wilk W Test not significant. F-Test followed by one-way, two-tailed unpaired Student's t-Test for unequal variance | <b>t(5.97) = 2.57, p = 0.043</b>                                                                   |
| <b>Fig. 6h</b> | % Replacement Rate during remyelination (Gray Matter vs. White Matter) calculated from Gompertz 3-parameter growth curves                              | 5.6±0.6% (GM) vs. 11.1±1.9% (WM)                                                                                  | n = 6 mice (cuprizone)                         | Shapiro-Wilk W Test not significant. F-Test followed by one-way, two-tailed unpaired Student's t-Test for unequal variance | <b>t(5.72) = 2.59, p = 0.043</b>                                                                   |
| <b>Fig. 6i</b> | Inflection point of Cumulative % Replacement (days from end of cuprizone) calculated from Gompertz 3-parameter modeling (Gray Matter vs. White Matter) | 15.352±0.77 (GM) vs. 15.358±1.56 Days post-cuprizone (WM)                                                         | n = 6 mice (cuprizone)                         | Shapiro-Wilk W Test not significant. F-Test followed by one-way, two-tailed unpaired Student's t-Test for equal variance   | t(10) = 0.0037, p = 0.997                                                                          |
| <b>Fig. 6j</b> | Rates of oligodendrocyte gain binned by 1-3 weeks relative to cuprizone administration (not modeled, % per week, GM vs. WM)                            | 8.2±1.1 vs. 3.0±0.5% per week, GM, Weeks 3-4 vs. Week 7; 18.1±5.1 vs. 4.5±1.3% per week, WM, Weeks 3-4 vs. Week 7 | n = 6 mice (cuprizone)                         | Shapiro-Wilk W Test not significant. One-way ANOVA followed by Dunnett's method for comparison with control                | <b>p = 0.002 for Weeks 3-4 vs. Week 7 in the GM; p = 0.0052 for Weeks 3-4 vs. Week 7 in the WM</b> |
|                | Peak oligodendrocyte gain rate (3-4 weeks post-cuprizone)                                                                                              | 8.2±1.1% (GM) vs. 18.1±5.1 (WM)                                                                                   |                                                | Two-way ANOVA followed by piecewise Student's t comparison with Bonferroni correction for multiple comparisons             | <b>p = 0.0009; Bonferroni-corrected alpha = 0.0125</b>                                             |
| <b>Fig. 6n</b> | Change in percentage of MOL1-positive oligodendrocytes with cuprizone demyelination in GM (% Cup. + 7w. - %P140)                                       | -1.50±3.36% vs. normalized % at P140                                                                              | n = 8 mice (P140), n = 7 mice (Cup. + 7 weeks) | Shapiro-Wilk W Test not significant. F-Test followed by one-way, two-tailed unpaired Student's t-Test for equal variance   | t(13) = -0.31, p = 0.763                                                                           |
|                | Change in percentage of MOL2/3-positive oligodendrocytes with cuprizone demyelination in GM (% Cup. + 7w. - %P140)                                     | -0.58±0.44% vs. normalized % at P140                                                                              | n = 8 mice (P140), n = 7 mice (Cup. + 7 weeks) | Shapiro-Wilk W Test not significant. F-Test followed by one-way, two-tailed unpaired Student's t-Test for equal variance   | t(13) = -0.86, p = 0.407                                                                           |
|                | Change in percentage of MOL5/6-positive oligodendrocytes with cuprizone demyelination in GM (% Cup. + 7w. - %P140)                                     | -14.9±2.0% vs. normalized % at P140                                                                               | n = 8 mice (P140), n = 7 mice (Cup. + 7 weeks) | Shapiro-Wilk W Test not significant. F-Test followed by one-way, two-tailed unpaired Student's t-Test for unequal variance | <b>t(13) = -3.712, p = 0.003</b>                                                                   |
|                | Change in percentage of MOL1-positive oligodendrocytes with cuprizone demyelination in WM (% Cup. + 7w. - %P140)                                       | 0.80±0.33% vs. normalized % at P140                                                                               | n = 8 mice (P140), n = 7 mice (Cup. + 7 weeks) | Shapiro-Wilk W Test significant. Wilcoxon rank sum test.                                                                   | Z  = 1.85, p = 0.064                                                                               |
|                | Change in percentage of MOL2/3-positive oligodendrocytes with cuprizone demyelination in WM (% Cup. + 7w. - %P140)                                     | 0.31±1.22% vs. normalized % at P140                                                                               | n = 8 mice (P140), n = 7 mice (Cup. + 7 weeks) | Shapiro-Wilk W Test not significant. F-Test followed by one-way, two-tailed unpaired Student's t-Test for equal variance   | t(13) = 0.22, p = 0.833                                                                            |
|                | Change in percentage of MOL5/6-positive oligodendrocytes with cuprizone demyelination in WM (% Cup. + 7w. - %P140)                                     | -22.6±4.2% vs. normalized % at P140                                                                               | n = 8 mice (P140), n = 7 mice (Cup. + 7 weeks) | Shapiro-Wilk W Test significant. Wilcoxon rank sum test.                                                                   | <b> Z  = 2.720, p = 0.007</b>                                                                      |
| <b>Fig. 6o</b> | Percentage of MOBP-EGFP oligodendrocytes that are MOL1-positive 7 weeks post-cuprizone removal                                                         | 15.8±3.3 (GM) vs. 1.5±0.3% (WM)                                                                                   | n = 8 mice (P140), n = 7 mice (Cup. + 7 weeks) | Shapiro-Wilk W Test not significant. F-Test followed by one-way, two-tailed unpaired Student's t-Test for unequal variance | <b>t(6.118) = -4.234, p = 0.005</b>                                                                |
|                | Percentage of MOBP-EGFP oligodendrocytes that are MOL2/3-positive 7 weeks post-cuprizone removal                                                       | 1.2±0.4 (GM) vs. 4.1±1.2% (WM)                                                                                    | n = 8 mice (P140), n = 7 mice (Cup. + 7 weeks) | Shapiro-Wilk W Test not significant. F-Test followed by one-way, two-tailed unpaired Student's t-Test for unequal variance | <b>t(7.560) = 2.187, p = 0.063</b>                                                                 |
|                | Percentage of MOBP-EGFP oligodendrocytes that are MOL5/6-positive 7 weeks post-cuprizone removal                                                       | 12.6±2.0 (GM) vs. 24.0±4.2% (WM)                                                                                  | n = 8 mice (P140), n = 7 mice (Cup. + 7 weeks) | Shapiro-Wilk W Test not significant. F-Test followed by one-way, two-tailed unpaired Student's t-Test for equal variance   | <b>t(12) = 2.432, p = 0.032</b>                                                                    |

Supplementary Table 3 | Statistics results table

Statistics results are sorted by figure, and both main figures and supplementary figures are listed in the order they appear in the text.

Statistically significant comparisons are bolded

Table 3.6: Statistics for Fig. 7

| Fig. 7         | Measure                                                                                              | Values                                                                              | N                                | Statistical test                                                                                      | Significance                                                                                                  |
|----------------|------------------------------------------------------------------------------------------------------|-------------------------------------------------------------------------------------|----------------------------------|-------------------------------------------------------------------------------------------------------|---------------------------------------------------------------------------------------------------------------|
| <b>Fig. 7d</b> | % new oligodendrocyte gain in the healthy brain per week by layer                                    | 2.6±0.2 (L4) vs. 1.4±0.2% (CC)                                                      | n = 6 healthy mice               | Shapiro-Wilk W Test not significant. One-way ANOVA followed by Tukey's HSD                            | <b>p = 0.012</b>                                                                                              |
| <b>Fig. 7e</b> | Percentage of MOBP-EGFP oligodendrocytes that are MOL1-positive at P140 by layer                     | 23.44±3.54% (L1-3) vs. 18.27±4.50% (L4) vs. 13.84±3.88% (L5-6) vs. 0.66±0.16% (CC)  | n = 8 mice (P140)                | Shapiro-Wilk W Test not significant. One-way ANOVA followed by Tukey's HSD                            | <b>p = 0.0004, L1-3 vs. CC; p = 0.006, L4 vs. CC</b>                                                          |
| <b>Fig. 7f</b> | Percentage of MOBP-EGFP oligodendrocytes that are MOL2/3-positive at P140 by layer                   | 0% (L1-3) vs. 0% (L4) vs. 2.98±0.78% (L5-6) vs. 3.75±0.0.82% (CC)                   | n = 8 mice (P140)                | Shapiro-Wilk W Test significant. Kruskal-Wallis test followed by Dunn's test for multiple comparisons | <b>p = 0.0034 (L4 vs. L5-6); p = 0.0034 (L1-3 vs. L5-6); p = 0.0009 (L4 vs. CC); p = 0.0009 (L5-6 vs. CC)</b> |
| <b>Fig. 7g</b> | Percentage of MOBP-EGFP oligodendrocytes that are MOL5/6-positive at P140 by layer                   | 21.674±4.12% (L1-3) vs. 26.38±3.1% (L4) vs. 31.26±3.09% (L5-6) vs. 46.42±4.69% (CC) | n = 8 mice (P140)                | Shapiro-Wilk W Test not significant. One-way ANOVA followed by Tukey's HSD                            | <b>p = 0.042 (L5-6 vs. CC); p = 0.005 (L4 vs. CC); p = 0.0005 (L1-3 vs. CC)</b>                               |
| <b>Fig. 7i</b> | % cuprizone-induced oligodendrocyte loss per week by layer                                           | 1.12±0.26 (L1-3) vs. 1.52±0.32(L4) vs. 2.106±0.12% (L5-6) vs. 1.88±0.23 (CC)        | n = 6 cuprizone mice             | Shapiro-Wilk W Test not significant. One-way ANOVA.                                                   | Prob > F = 0.0504                                                                                             |
| <b>Fig. 7j</b> | Percentage of MOBP-EGFP oligodendrocytes that are MOL1-positive at 4 days post-cuprizone by layer    | 7.56±2.88% (L1-3) vs. 1.23±0.67% (L4) vs. 0.31±0.17% (L5-6) vs. 0.09±0.06% (CC)     | n = 5 mice (Cuprizone + 4 days)  | Shapiro-Wilk W Test significant. Kruskal-Wallis test followed by Dunn's test for multiple comparisons | <b>p = 0.016, L1-3 vs. CC</b>                                                                                 |
| <b>Fig. 7k</b> | Percentage of MOBP-EGFP oligodendrocytes that are MOL2/3-positive at 4 days post-cuprizone by layer  | 0% (L1-3) vs. 0% (L4) vs. 0.09±0.09% (L5-6) vs. 01.18±0.23% (CC)                    | n = 5 mice (Cuprizone + 4 days)  | Shapiro-Wilk W Test significant. Kruskal-Wallis test followed by Dunn's test for multiple comparisons | <b>p = 0.022 L5-6 vs. CC; p = 0.004 L4 vs. CC; p = 0.004 L1-3 vs. CC</b>                                      |
| <b>Fig. 7l</b> | Percentage of MOBP-EGFP oligodendrocytes that are MOL5/6-positive at 4 days post-cuprizone by layer  | 6.65±2.28% (L1-3) vs. 4.41±0.133% (L4) vs. 1.90±0.82% (L5-6) vs. 4.85±1.59% (CC)    | n = 5 mice (Cuprizone + 4 days)  | Shapiro-Wilk W Test not significant. One-way ANOVA.                                                   | Prob > F = 0.250                                                                                              |
| <b>Fig. 7n</b> | Oligodendrocyte replacement rate during remyelination (% of lost cells replaced per week) by layer   | 6.34±0.97% (L1-3) vs. 7.88±1.60% (L4) vs. 5.98±0.59% (L5-6) vs. 12.01±2.26% (CC)    | n = 6 cuprizone mice             | Shapiro-Wilk W Test not significant. One-way ANOVA followed by Tukey's HSD                            | <b>Prob &gt; F = 0.034, p = 0.042 (L5-6 vs. CC)</b>                                                           |
| <b>Fig. 7o</b> | Percentage of MOBP-EGFP oligodendrocytes that are MOL1-positive at 7 weeks post-cuprizone by layer   | 16.34±4.63% (L1-3) vs. 20.60±5.47% (L4) vs. 13.66±2.91% (L5-6) vs. 1.46±0.33% (CC)  | n = 7 mice (Cuprizone + 7 weeks) | Shapiro-Wilk W Test not significant. One-way ANOVA followed by Tukey's HSD                            | <b>p = 0.012 (L4 vs. CC)</b>                                                                                  |
| <b>Fig. 7p</b> | Percentage of MOBP-EGFP oligodendrocytes that are MOL2/3-positive at 7 weeks post-cuprizone by layer | 0% (L1-3) vs. 0% (L4) vs. 2.33±0.97% (L5-6) vs. 4.06±1.22% (CC)                     | n = 7 mice (Cuprizone + 7 weeks) | Shapiro-Wilk W Test significant. Kruskal-Wallis test followed by Dunn's test for multiple comparisons | <b>p = 0.025 (L1-3 vs. L5-6); p = 0.025 (L4 vs. L5-6); p = 0.003 (L1-3 vs. CC); p = 0.003 (L4 vs. CC)</b>     |
| <b>Fig. 7q</b> | Percentage of MOBP-EGFP oligodendrocytes that are MOL5/6-positive at 7 weeks post-cuprizone by layer | 13.87±1.86% (L1-3) vs. 19.67±2.57% (L4) vs. 10.58±2.17% (L5-6) vs. 23.98±4.24% (CC) | n = 7 mice (Cuprizone + 7 weeks) | Shapiro-Wilk W Test not significant. One-way ANOVA followed by Tukey's HSD                            | <b>p = 0.015 (L5-6 vs. CC)</b>                                                                                |

Supplementary Table 3 | Statistics results table

Statistics results are sorted by figure, and both main figures and supplementary figures are listed in the order they appear in the text.

**Statistically significant comparisons are bolded**

Table 3.7: Statistics for Fig. 8 and associated extended data (Extended Data Fig. 10)

| Fig. 8                   | Measure                                                                                                                                                        | Values                                                                                                                                                                                                                                                                                                                                                     | N                                                                       | Statistical test                                                                                                                                    | Significance                                                                                                                                                                                                                                                                                                                                                                               |
|--------------------------|----------------------------------------------------------------------------------------------------------------------------------------------------------------|------------------------------------------------------------------------------------------------------------------------------------------------------------------------------------------------------------------------------------------------------------------------------------------------------------------------------------------------------------|-------------------------------------------------------------------------|-----------------------------------------------------------------------------------------------------------------------------------------------------|--------------------------------------------------------------------------------------------------------------------------------------------------------------------------------------------------------------------------------------------------------------------------------------------------------------------------------------------------------------------------------------------|
| <b>Fig. 8b</b>           | Scaled Total % Population Gain (Cuprizone vs. Healthy)                                                                                                         | 0.33±0.08 (cuprizone) vs. 0.57±0.14 (healthy)                                                                                                                                                                                                                                                                                                              | n = 6 mice (healthy), n = 6 mice (cuprizone)                            | Shapiro-Wilk W Test not significant. Two-way ANOVA followed by piecewise Student's t comparison with Bonferroni correction for multiple comparisons | <b>p = 0.006, Bonferroni-corrected alpha = 0.0125</b>                                                                                                                                                                                                                                                                                                                                      |
| <b>Fig. 8c</b>           | Scaled % Gain Rate (Cuprizone vs. Healthy)                                                                                                                     | 0.30±0.03 (cuprizone) vs. 0.57±0.06 (healthy)                                                                                                                                                                                                                                                                                                              | n = 6 mice (healthy), n = 6 mice (cuprizone)                            | Shapiro-Wilk W Test not significant. Two-way ANOVA followed by piecewise Student's t comparison with Bonferroni correction for multiple comparisons | <b>p = 0.0025, Bonferroni-corrected alpha = 0.0125</b>                                                                                                                                                                                                                                                                                                                                     |
| <b>Fig. 8d</b>           | Scaled inflection point of % Cumulative Gain or Replacement (days from end of cuprizone) calculated from Gompertz 3-parameter modeling (Cuprizone vs. Healthy) | Scaled inflection points across treatment and layers = 0.67±0.02                                                                                                                                                                                                                                                                                           | n = 6 mice (healthy), n = 6 mice (cuprizone)                            | Shapiro-Wilk W Test not significant. Two-way ANOVA no significant interaction.                                                                      | Prob > F = 0.284                                                                                                                                                                                                                                                                                                                                                                           |
| <b>Fig. 8e</b>           | # of MOL subtypes present at each layer across healthy, Cup. + 4d., and Cup. + 7 weeks groups                                                                  | L1-3: 2.0±0.0 classes (Healthy P140); 0.8±0.49 (Cup. + 4d.); 1.71±0.18 (Cup. + 7wk.)<br>L4: 1.88±0.13 classes (Healthy P140); 0.4±0.24 (Cup. + 4d.); 1.71±0.18 (Cup. + 7wk.)<br>L5-6: 2.0±0.0 classes (Healthy P140); 1.4±0.25 (Cup. + 4d.); 1.71±0.29 (Cup. + 7wk.)<br>CC: 2.0±0.0 classes (Healthy P140); 1.4±0.25 (Cup. + 4d.); 1.71±0.29 (Cup. + 7wk.) | n = 8 mice (P140), n = 5 mice (Cup. + 4d.), n = 7 mice (Cup. + 7 weeks) | Shapiro-Wilk W Test significant. Kruskal-Wallis test followed by Dunn's test for multiple comparisons                                               | <b>L1-3: Prob &gt; ChiSq = 0.036; p = 0.021 (Healthy vs. Cup + 4d.)</b><br><b>L4: Prob &gt; ChiSq = 0.002; p = 0.003 (Healthy vs. Cup + 4d.); p = 0.019 (Cup. + 7wks. vs. Cup. + 4d.)</b><br><b>L5-6: Prob &gt; ChiSq = 0.002; p = 0.005 (Healthy vs. Cup + 4d.); p = 0.009 (Cup. + 7wks. vs. Cup. + 4d.)</b><br>CC: Prob > ChiSq = 0.051                                                  |
| <b>Fig. 8f</b>           | Percentage of MOB-EGFP oligodendrocytes that are MOL1-positive across healthy, Cup. + 4d., and Cup. + 7 weeks groups                                           | Percentage MOL1-positive oligodendrocytes across time point, treatment, and layers =                                                                                                                                                                                                                                                                       | n = 8 mice (P140), n = 5 mice (Cup. + 4d.), n = 7 mice (Cup. + 7 weeks) | Two-way ANOVA no significant interaction.                                                                                                           | Prob > F = 0.1397                                                                                                                                                                                                                                                                                                                                                                          |
| <b>Fig. 8g</b>           | Percentage of MOB-EGFP oligodendrocytes that are MOL2/3-positive across healthy, Cup. + 4d., and Cup. + 7 weeks groups                                         | Percentage MOL1-positive oligodendrocytes across time point, treatment, and layers                                                                                                                                                                                                                                                                         | n = 8 mice (P140), n = 5 mice (Cup. + 4d.), n = 7 mice (Cup. + 7 weeks) | Two-way ANOVA no significant interaction.                                                                                                           | Prob > F = 0.105                                                                                                                                                                                                                                                                                                                                                                           |
| <b>Fig. 8h</b>           | Percentage of MOB-EGFP oligodendrocytes that are MOL5/6-positive across healthy, Cup. + 4d., and Cup. + 7 weeks groups                                         | L4: 26.4±3.11 (Healthy P140) vs. 4.4±1.33 (Cup. + 4d.)<br>L5-6: 31.3±3.09 (Healthy P140) vs. 1.9±0.82 (Cup. + 4d.); vs. 10.6±2.17 (Cup. + 7w.)<br>CC: 46.4±4.69 (Healthy P140) vs. 4.9±1.58 (Cup. + 4d.) vs. 24.0±4.24 (Cup. + 7w.)                                                                                                                        | n = 8 mice (P140), n = 5 mice (Cup. + 4d.), n = 7 mice (Cup. + 7 weeks) | Shapiro-Wilk W Test not significant. Two-way ANOVA followed by Tukey's HSD.                                                                         | <b>Prob &gt; F = 0.004 (Condition x Layer), L4: p = 0.001 (Healthy P140 vs. Cup. + 4d.)</b><br><b>L5/6: p &lt; 0.0001 (Healthy P140 vs. Cup. + 4d.); p &lt; 0.0007 (Healthy P140 vs. Cup. + 7wk.); p = 0.834 (Cup. + 4d. Vs. Cup. + 7wk.)</b><br><b>CC: p &lt; 0.0001 (Healthy P140 vs. Cup. + 4d.), p = 0.0001 (Healthy P140 vs. Cup. + 7wk.), p = 0.012 (Cup. + 4d. Vs. Cup. + 7wk.)</b> |
| <b>Ext. Data Fig. 10</b> |                                                                                                                                                                |                                                                                                                                                                                                                                                                                                                                                            |                                                                         |                                                                                                                                                     |                                                                                                                                                                                                                                                                                                                                                                                            |
| <b>Fig. 10a</b>          | Oligodendrocyte replacement rate (% per week) across one week time bins (unmodeled)                                                                            | L1-3: 2.04±0.28 (healthy); 7.59±1.27 (Week 2); 7.69±1.06 (Week 3); 6.91±1.19 (Week 4)<br>L4: 2.62±0.29 (healthy); 10.96±2.24 (Week 3); 9.35±1.70 (Week 4)<br>L5-6: 2.11±0.24 (healthy); 11.13±2.02 (Week 3); 6.56±1.17 (Week 4)<br>CC: 21.42±0.21 (healthy); 18.98±6.17 (Week 2); 25.99±9.04 (Week 3); 10.68±1.13 (Week 4)                                 | n = 6 mice (healthy), n = 6 mice (cuprizone)                            | Shapiro-Wilk W Test significant. Kruskal-Wallis followed by Steel Method for nonparametric multiple comparisons with control.                       | <b>p = 0.034 for L1-3, Weeks 2-4 vs. Healthy; p = 0.034 for L4 Weeks 3-4 vs. Healthy; p = 0.034 for L5-6, Weeks 3-4 vs. Healthy; p = 0.034 for CC Weeks 2-4 vs. Healthy</b>                                                                                                                                                                                                                |
| <b>Fig. 10c</b>          | Full-width at half-maximum of the oligodendrocyte replacement response curve in (10b) by layer (days)                                                          | 19.89±2.14 (L1-3) vs. 11.70±2.37 (CC)                                                                                                                                                                                                                                                                                                                      | n = 6 mice (healthy), n = 6 mice (cuprizone)                            | Shapiro-Wilk W Test not significant. One-way ANOVA followed by Tukey's HSD                                                                          | <b>p = 0.048</b>                                                                                                                                                                                                                                                                                                                                                                           |
| <b>Fig. 10d</b>          | Area under the curve (after subtraction of the healthy gain curve) of the oligodendrocyte replacement response in (10b) by layer                               | 22.8±2.9 (L5-6) vs. 56.2±12.1% (CC)                                                                                                                                                                                                                                                                                                                        | n = 6 mice (healthy), n = 6 mice (cuprizone)                            | Shapiro-Wilk W Test not significant. One-way ANOVA followed by Tukey's HSD                                                                          | <b>p = 0.037</b>                                                                                                                                                                                                                                                                                                                                                                           |
| <b>Fig. 10e</b>          | Full-width at half-maximum of the oligodendrocyte loss response by layer                                                                                       | 15.10±2.23 (L1-3) vs. 13.04±2.08 (L4) vs. 12.06±1.13 (L5-6) vs. 10.64±1.91 (CC)                                                                                                                                                                                                                                                                            | n = 6 mice (healthy), n = 6 mice (cuprizone)                            | Shapiro-Wilk W Test significant. Kruskal-Wallis test.                                                                                               | Prob > ChiSq = 0.515                                                                                                                                                                                                                                                                                                                                                                       |
| <b>Fig. 10f</b>          | Area under the curve (after subtraction of the healthy gain curve) of the oligodendrocyte loss response by layer                                               | 51.32±12.07 (L1-3) vs. 60.31±12.31 (L4) vs. 85.49±4.39 (L5-6) vs. 73.86±6.51 (CC)                                                                                                                                                                                                                                                                          | n = 6 mice (healthy), n = 6 mice (cuprizone)                            | Shapiro-Wilk W Test not significant. One-way ANOVA                                                                                                  | Prob > F = 0.087                                                                                                                                                                                                                                                                                                                                                                           |
